# Supplementary material for: An α2-Adrenergic Agonist, Brimonidine, Beneficially Affects the TGF-β2-Treated Cellular Properties in an In Vitro Culture Model
Source: MDPI journal article supplement (doi:10.3390/bioengineering9070310), 2022-07-12
Supplement: s1 [file s1]

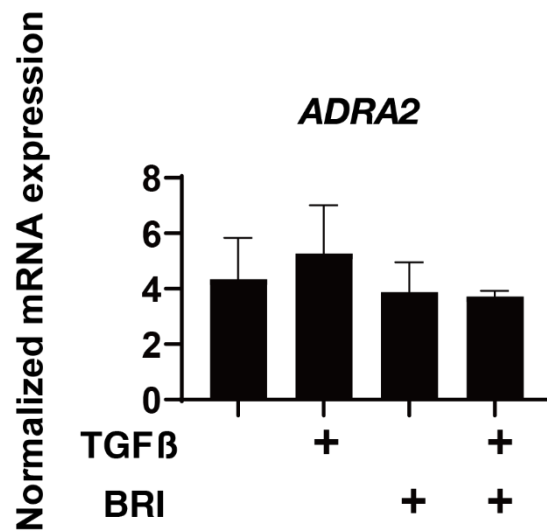

**Supplemental Figure S1. The mRNA expression of the  $\alpha 2$  adrenergic receptor by HTM cells.**

At Day 6, 3D HTM spheroids (control) and those treated with 5 ng/ml TGF- $\beta 2$  in the absence or presence of 10  $\mu$ M brimonidine (BRI) were subjected to qPCR analysis to estimate the expression of mRNA in  *$\alpha 2$  adrenergic receptor*. All experiments were performed in duplicate using fresh preparations consisting of 16 spheroids each. Data are presented as the arithmetic mean  $\pm$  the standard error of the mean (SEM).

**Supplemental Table S1. Sequences of primers of qPCR.**

|                            |         | Sequence                                             | Exon Location | RefSeq Number | Product Length (bp) |
|----------------------------|---------|------------------------------------------------------|---------------|---------------|---------------------|
| human RPLP0 <sup>*1</sup>  | Probe   | 5'-/56-FAM/CCCTGTCTT/ZEN/CCCTGGGCATCAC/3IABkFQ/-3'   |               |               |                     |
|                            | Primer2 | 5'-TCGTCTTTAAACCCTGCGTG-3'                           | 2-3           | NM_001002     | 143                 |
|                            | Primer1 | 5'-TGTCTGCTCCCACAATGAAAC-3'                          |               |               |                     |
| human COL1A1 <sup>*1</sup> | Probe   | 5'-/56-FAM/TCGAGGGCC/ZEN/AAGACGAAGACATC/3IABkFQ/-3'  |               |               |                     |
|                            | Primer2 | 5'-GACATGTTACAGCTTGTGGAC-3'                          | 1-2           | NM_000088     | 115                 |
|                            | Primer1 | 5'-TTCTGTACGCAGGTGATTGG-3'                           |               |               |                     |
| human COL4A1 <sup>*1</sup> | Probe   | 5'-/56-FAM/TCATACAGA/ZEN/CTTGGCAGCGGCT/3IABkFQ/-3'   | 51-52         | NM_001845     | 142                 |
|                            | Primer2 | 5'-AGAGAGGAGCGAGATGTTCA-3'                           |               |               |                     |
|                            | Primer1 | 5'-TGAGTCAGGCTTCATTATGTTCT-3'                        |               |               |                     |
| human COL6A1 <sup>*1</sup> | Probe   | 5'-/56-FAM/CAGGTTTCG/ZEN/GTCACAGCGGTAGT/3IABkFQ/-3'  |               |               |                     |
|                            | Primer2 | 5'-CCTCGTGGACAAAAGTCAAGT-3'                          | 2-3           | NM_001848     | 114                 |
|                            | Primer1 | 5'-GTGAGGCCTTGGATGATCTC-3'                           |               |               |                     |
| human FN1 <sup>*1</sup>    | Probe   | 5'-/56-FAM/TACAGCTTA/ZEN/TTCTCCCTCGCCCAG/3IABkFQ/-3' |               |               |                     |
|                            | Primer2 | 5'-CGTCCTAAAGACTCCATGATCTG-3'                        | 3-4           | NM_212482     | 129                 |
|                            | Primer1 | 5'-ACCAATCTTGTAGGACTGACC-3'                          |               |               |                     |
| human αSMA <sup>*1</sup>   | Probe   | 5'-/56-FAM/AGACCCTGT/ZEN/TCCAGCCATCCTTC/3IABkFQ/-3'  |               |               |                     |
|                            | Primer2 | 5'-AGAGTTACGAGTTGCCTGATG-3'                          | 8-9           | NM_001613     | 105                 |
|                            | Primer1 | 5'-CTGTTGTAGGTGGTTTCATGGA-3'                         |               |               |                     |
| human Grp78 <sup>*2</sup>  | Forward | 5'-CATCACGCCGTCCTATGTCG-3'                           |               | NM_005347     | 215                 |
|                            | Reverse | 5'-CGTCAAAGACCGTGTCTCG-3'                            |               |               |                     |
| human GRP94 <sup>*2</sup>  | Forward | 5'-CTGGGACTGGGAACCTATGAATG-3'                        |               | NM_003299     | 152                 |
|                            | Reverse | 5'-TCCATATTCGTCAAACAGACCAC-3'                        |               |               |                     |
| human XBP <sup>*2</sup>    | Forward | 5'-AGTAGCAGCTCAGACTGCCA-3'                           |               | NM_005080     | 313                 |
|                            | Reverse | 5'-CCTGGTTCTCAACTACAAGGC-3'                          |               |               |                     |
| human sXBP <sup>*2</sup>   | Forward | 5'-GGTCTGCTGAGTCCGCAGCAGG-3'                         |               | AB076384      | 97                  |
|                            | Reverse | 5'-GGGCTTGGTATATATGTGG-3'                            |               |               |                     |
| human CHOP <sup>*2</sup>   | Forward | 5'-GGAGAACCAGGAAACGGAAAC-3'                          |               | NM_004083     | 69                  |
|                            | Reverse | 5'-TTCCTTCATGCGCTGCTTT-3'                            |               |               |                     |
| Human ADRA2 <sup>*1</sup>  | Probe   | 5'-/56-FAM/AGGAAGCGG/ZEN/ATCGTGTGAGGTTTC/3IABkFQ/-3' |               |               |                     |
|                            | Primer2 | 5'-GCAGTCAGCGTGAGTCTAC-3'                            | 1-1           | NM_000681     | 121                 |
|                            | Primer1 | 5'-TCATCTACACCATCTTCAACCAC-3'                        |               |               |                     |

\*1 Taqman probes (IDT, Coralville, IA, USA). \*2 SYBR probes (IDT, Coralville, IA, USA).
